# Supplementary material for: A motor neuron disease mouse model reveals a non-canonical profile of senescence biomarkers
Source: PubMed Central journal article supplement (PMC9459393; doi:10.1242/dmm.049059), 2022-08-29
Supplement: dmm-15-049059-s1.pdf [file dmm-15-049059-s1.pdf]

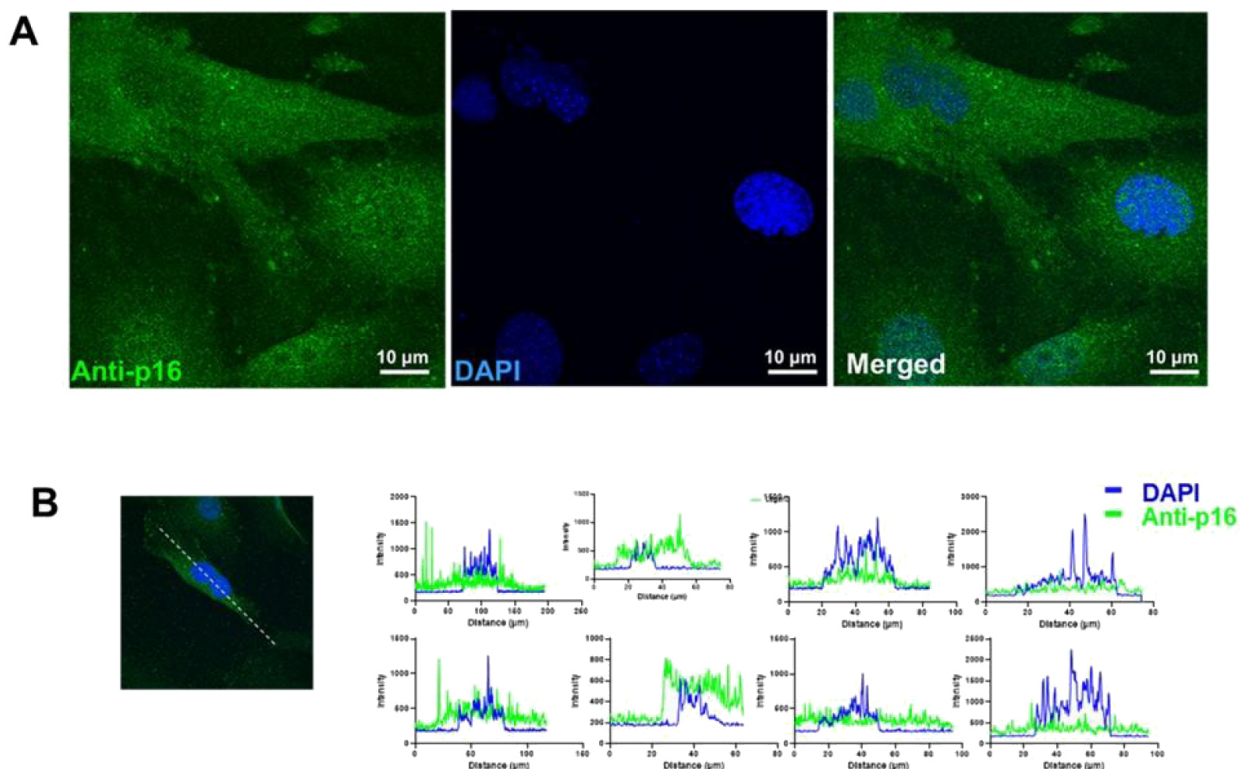

**Fig. S1. Cytosolic abundance of anti-p16 immunostaining.** A) Representative confocal images showing both cytosolic and nuclear immunoreactivity against anti-p16 in adult mice fibroblasts. B) Abundance profiles of cellular immunoreactivity of anti-p16 (green) in comparison with DAPI fluorescence (blue). The left panel shows a representative cell with the line employed for quantification (white discontinuous).

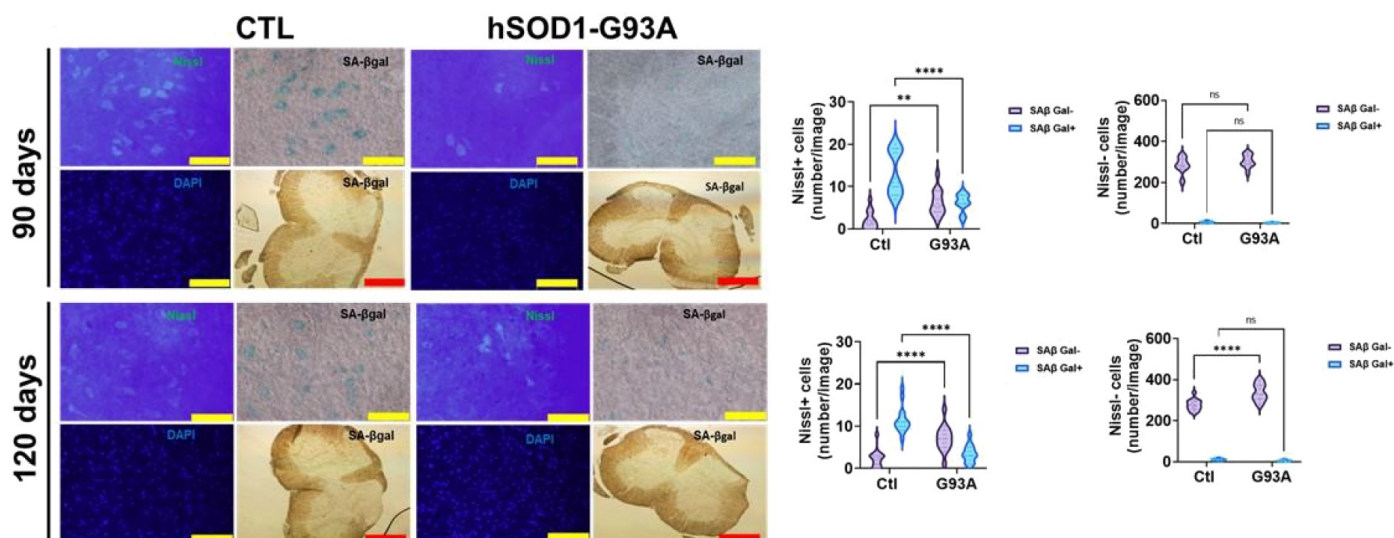

**Fig. S2.** SA-beta-gal activity was decreased in 90- and 120-day-old hSOD1-G93A mice. Nissl+ cells are the main contributors of this activity, which is lower in ALS mice. In contrast, Nissl- cells exhibited a slight decrease in transgenic mice. \*\*\* $p < 0.001$ ; \*\*\*\* $p < 0.0001$ . Yellow scale bar represents 500  $\mu\text{m}$  and red scale bar represents 2500  $\mu\text{m}$ .

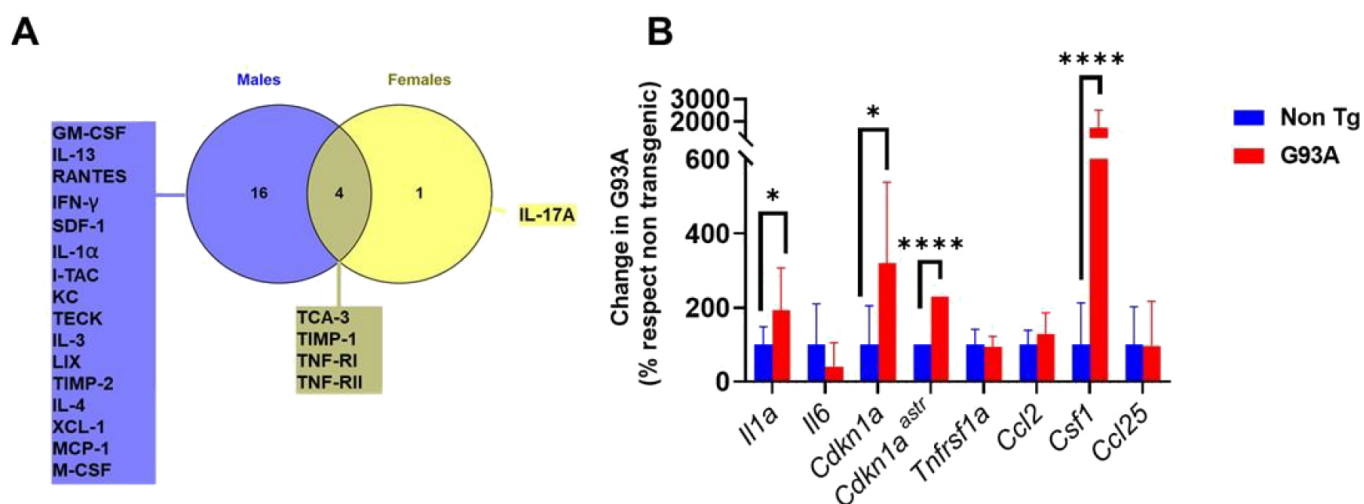

**Fig. S3. Sex and cell subtype influences senescence-related phenomena in G93A mice.** A) Venn diagram showing the LSC protein significantly affected by G93A expression according the antibody array. B) mRNA levels of selected genes, evaluated by RNAseq in microglial cells (Chiu et al., 2013) and astrocytes (Liu et al., 2020, *Cdkn1a<sup>astr</sup>*) from G93A mice. Data were obtained from publically available databases, and expressed as mean  $\pm$ SEM. ns  $p > 0.05$ ; \* $p < 0.05$ , and \*\*\*\* $p < 0.0001$  by Students t test.

**Table S1. SYBR Green probes used in RT-qPCR analysis**

| Gene                       | Sequence                |
|----------------------------|-------------------------|
| <i>Actb</i> Fwd            | GTGACGTTGACATCCGTAAAGA  |
| <i>Actb</i> Rev            | GCCGGACTCATCGTACTCC     |
| <i>p16</i> Fwd             | CCCAACGCCCCGAACT        |
| <i>p16</i> Rev             | GCAGAAGAGCTGCTACGTGAA   |
| <i>Il1a</i> Fwd            | AGCGCTCAAGGAGAAGACC     |
| <i>Il1a</i> Rev            | CCAGAAGAAAATGAGGTCGG    |
| <i>Il6</i> Fwd             | ACCAGAGGAAATTTTCAATAGGC |
| <i>Il6</i> Rev             | TGATGCACTTGCAGAAAACA    |
| <i>Ifna</i> Fwd            | ATGGCTAGGCTCAGCACTTTC   |
| <i>Ifna</i> Rev            | CTCACTCAGACTTGCCAGCA    |
| <i>Ifnb</i> Fwd            | AGCTCCAAGAAAGGACGAACA   |
| <i>Ifnb</i> Rev            | GCCCTGTAGGTGAGGTTGAT    |
| <i>Adipor2</i> Fwd         | TGTTTGTAAGGTGTGGGAAGG   |
| <i>Adipor2</i> Rev         | GTTGCCCGTCTCTGTGTGTAT   |
| <i>Adipor2</i> cryptic Fwd | AGAAGTGGAGTTACAATTGTG   |
| <i>Adipor2</i> cryptic Rev | AAACAAACTCTTCCATTCGTT   |
| <i>p21</i> Fwd             | TTGCCAGCAGAATAAAAGGTG   |
| <i>p21</i> Rev             | TTTGCTCCTGTGCGGAAC      |
